# Supplementary material
Source: HighWire-hosted journal article supplement (http://www.canjsurg.ca/highwire/filestream/98496/field_highwire_adjunct_files/0/CJS-009321-at-1.pdf)
Supplement: CJS-009321-at-1.pdf [file CJS-009321-at-1.pdf]

**Supplementary Table 1. Parental Leave Policies for American Board of Medical Specialties (ABMS) Members as of 2018**

| Subspecialty Policies that do not address Parental Leave        |                                                     |                     |                         |
|-----------------------------------------------------------------|-----------------------------------------------------|---------------------|-------------------------|
|                                                                 | Total Allowed Leave                                 |                     | Total Allowed Leave     |
| Allergy and Immunology                                          | 4 wks/yr                                            | Orthopedic Surgery  | 6 wks/yr                |
| Anesthesiology                                                  | 12 wks during years 1-3                             | Otolaryngology      | 6 wks/yr                |
| Emergency Medicine                                              | 6 wks/yr                                            | Preventive Medicine | 8 wks/yr                |
| Family Medicine                                                 | 4 wks/yr                                            | Radiology           | Leave is not time based |
| Nuclear Medicine                                                | No max                                              | Urology             | 6 wks/yr                |
| Ophthalmology                                                   | No max                                              |                     |                         |
| Subspecialty Policies that specifically address Maternity Leave |                                                     |                     |                         |
|                                                                 | Total Allowed Leave                                 |                     |                         |
| Neurological Surgery                                            | No max                                              |                     |                         |
| Obstetrics and Gynecology                                       | 8 wks/year; 20 wks in training                      |                     |                         |
| Pathology                                                       | 4 wks/year                                          |                     |                         |
| Pediatrics                                                      | 4 wks/year no more than 3 months in during training |                     |                         |
| Plastic Surgery                                                 | 4 wks/year                                          |                     |                         |
| Physical Medicine and Rehabilitation                            | 6 wks/year                                          |                     |                         |
| Psychiatry and Neurology                                        | No max given                                        |                     |                         |
| Surgery                                                         | 4 wks/year                                          |                     |                         |
| Subspecialty Leave Policies are not available                   |                                                     |                     |                         |
| Colon and Rectal Surgery                                        |                                                     |                     |                         |
| Thoracic Surgery                                                |                                                     |                     |                         |

Abbreviations: Wks: weeks. Adapted from Varda et al <sup>23</sup> JAMA 2018

**Supplementary Table 2. Comparison of Maternity Leave among European and North American Nations**

| Country        | Duration of Maternity Leave Weeks Post Natal | Payment                       |
|----------------|----------------------------------------------|-------------------------------|
| European Union |                                              |                               |
| Sweden         | 7 NM                                         | Optional                      |
| Germany        | 8 M                                          | 100%                          |
| Belgium        | 9 M                                          | 100%                          |
| Netherlands    | 10 M                                         | 100%                          |
| France         | 14 NM                                        | 100%                          |
| Finland        | 2 M, 9 NM                                    | 56 days at 90% then 70%       |
| Denmark        | 2 M, 14 NM                                   | 100%                          |
| Italy          | 16 M                                         | 100%                          |
| United Kingdom | 2 M, 41 NM                                   | Variable                      |
| Ireland        | 4 M, 40 NM                                   | €230 for 26 weeks then unpaid |
| North America  |                                              |                               |
| Canada         | 15-17 NM                                     | 55%                           |
| United States  | 12 NM                                        | 0 %                           |

Abbreviations: NM; Non-mandatory, M; Mandatory. This table was adapted from Dingemann et al <sup>26</sup>. Maternity leave policies in the EU (governed by the 1992 Pregnant Workers Directive). Minimum period for maternity leave at 14 weeks, with 2 weeks' compulsory leave before and/or after childbirth; leave subject to national legislation. Canadian maternity leave is supplemented by Canada's Employment Insurance and may be topped up provincially.

Appendix 1 to Jakubowski JS, Baltzer H, Lipa JE, et al. Parental leave policies and perceptions of pregnancy during surgical residency training in North America: a scoping review. *Can J Surg* 2023. Copyright © 2023 The Author(s) or their employer(s). To receive this resource in an accessible format, please contact us at [cmajgroup@cmaj.ca](mailto:cmajgroup@cmaj.ca).
